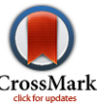

# Fumarate Analogs Act as Allosteric Inhibitors of the Human Mitochondrial NAD(P)<sup>+</sup>-Dependent Malic Enzyme

Ju-Yi Hsieh<sup>1,9</sup>, Jyung-Hung Liu<sup>1,2,9</sup>, Pai-Chun Yang<sup>1</sup>, Chi-Li Lin<sup>3</sup>, Guang-Yaw Liu<sup>4\*</sup>, Hui-Chih Hung<sup>1,2,5\*</sup>

**1** Department of Life Sciences, National Chung Hsing University, Taichung, Taiwan, **2** Institute of Genomics and Bioinformatics, National Chung Hsing University, Taichung, Taiwan, **3** Institute of Medicine, Chung Shan Medical University, Taichung, Taiwan, **4** Institute of Microbiology & Immunology, Chung Shan Medical University, and Division of Allergy, Immunology, and Rheumatology, Chung Shan Medical University Hospital, Taichung, Taiwan, **5** Agricultural Biotechnology Center (ABC), National Chung Hsing University, Taichung, Taiwan

## Abstract

Human mitochondrial NAD(P)<sup>+</sup>-dependent malic enzyme (m-NAD(P)-ME) is allosterically activated by the four-carbon *trans* dicarboxylic acid, fumarate. Previous studies have suggested that the dicarboxylic acid in a *trans* conformation around the carbon-carbon double bond is required for the allosteric activation of the enzyme. In this paper, the allosteric effects of fumarate analogs on m-NAD(P)-ME are investigated. Two fumarate-insensitive mutants, m-NAD(P)-ME\_R67A/R91A and m-NAD(P)-ME\_K57S/E59N/K73E/D102S, as well as c-NADP-ME, were used as the negative controls. Among these analogs, mesaconate, *trans*-aconitate, monomethyl fumarate and monoethyl fumarate were allosteric activators of the enzyme, while oxaloacetate, diethyl oxalacetate, and dimethyl fumarate were found to be allosteric inhibitors of human m-NAD(P)-ME. The IC<sub>50</sub> value for diethyl oxalacetate was approximately 2.5 mM. This paper suggests that the allosteric inhibitors may impede the conformational change from open form to closed form and therefore inhibit m-NAD(P)-ME enzyme activity.

**Citation:** Hsieh J-Y, Liu J-H, Yang P-C, Lin C-L, Liu G-Y, et al. (2014) Fumarate Analogs Act as Allosteric Inhibitors of the Human Mitochondrial NAD(P)<sup>+</sup>-Dependent Malic Enzyme. PLoS ONE 9(6): e98385. doi:10.1371/journal.pone.0098385

**Editor:** Luis Menéndez-Arias, Centro de Biología Molecular Severo Ochoa (CSIC-UAM), Spain

**Received:** February 14, 2014; **Accepted:** May 2, 2014; **Published:** June 9, 2014

**Copyright:** © 2014 Hsieh et al. This is an open-access article distributed under the terms of the Creative Commons Attribution License, which permits unrestricted use, distribution, and reproduction in any medium, provided the original author and source are credited.

**Funding:** This work was supported by the Ministry of Science and Technology, ROC (NSC 101-2311-B-005-005-MY3 to H.-C.H.) and in part by the Ministry of Education, Taiwan, R.O.C. under the ATU plan. The funders had no role in study design, data collection and analysis, decision to publish, or preparation of the manuscript.

**Competing Interests:** The authors have declared that no competing interests exist.

\* E-mail: hchung@dragon.nchu.edu.tw (HCH); liugy@csmu.edu.tw (GYL)

<sup>9</sup> These authors contributed equally to this work.

## Introduction

Malic enzymes (MEs) are a family of Mg<sup>2+</sup> or Mn<sup>2+</sup>-dependent oxidative decarboxylases that catalyze L-malate to CO<sub>2</sub> and pyruvate, with a concomitant reduction of NAD(P)<sup>+</sup> to NAD(P)H [1–4]. Malic enzymes are abundant in all species from bacteria to humans. In mammals, there are three isoforms distributed within the cells according to their subcellular localization and cofactor specificity: the cytosolic NADP<sup>+</sup>-dependent malic enzyme (c-NADP-ME, ME1) [5,6], the mitochondrial NAD(P)<sup>+</sup>-dependent malic enzyme (m-NAD(P)-ME, ME2) [2,7,8] and the mitochondrial NADP<sup>+</sup>-dependent malic enzyme (m-NADP-ME, ME3) [9]. c-NADP-ME is expressed in the liver and adipose tissues [1,5] and generates the NADPH required for the biosynthesis of long-chain fatty acids and steroids [1,5,7,9]. m-NADP-ME is found in tissues with low division rates, such as heart, muscle and brain tissue, and it also generates the NADPH for fatty acid biosynthesis [1]. The m-NAD(P)-ME isoform can use either NAD<sup>+</sup> or NADP<sup>+</sup> as a cofactor in the catalytic reaction, and therefore, this enzyme generates NADH and NADPH in the mitochondria and may play dual roles in energy production and reductive biosynthesis [2,10,11]. Furthermore, m-NAD(P)-ME is exclusively regulated by the TCA cycle intermediate, fumarate, which acts as an allosteric activator of the enzyme. The enzyme is also inhibited by ATP, but the ATP binding sites differ from the fumarate binding sites on the enzyme [12–14].

There is growing evidence that the m-NAD(P)-ME is involved in tumor growth and transformation because it is overexpressed in tumors and is required for optimal NADPH production, glutaminolysis and lipid synthesis [7,8,11,15–19]. Recently studies showed that p53 inversely regulates these metabolic pathways via m-NAD(P)-ME repression [20,21]. Because allosteric regulation is unique to m-NAD(P)-ME and may subsequently have profound effects on cancer cell metabolism, designing or discovering allosteric inhibitors for this enzyme may be important for cancer therapy.

Various structures of human m-NAD(P)-ME, including an open form without substrate and metal ion and a closed form with a bound substrate analog and all cofactors and regulators, are available [12,22–24]. In the structure of the enzyme, two regulatory sites can be found in proximity to the active site. One site is located at the dimer interface and is occupied by the allosteric activator, fumarate [12,25]; the other site is located at the tetramer interface and is occupied by either an NAD or an ATP molecule. In the structure of the fumarate-bound enzyme, fumarate is ion-paired with Arg67 and Arg91. When these Arg residues are mutated, the fumarate activating effect is completely abolished [12]. Furthermore, earlier studies by our group demonstrated that some ionic amino acid residues that are not conserved among the different malic enzyme isoforms, including Lys57, Glu59, Lys73 and Asp102, have remarkable effects on fumarate-induced activation [12,26–28]. We also examined the

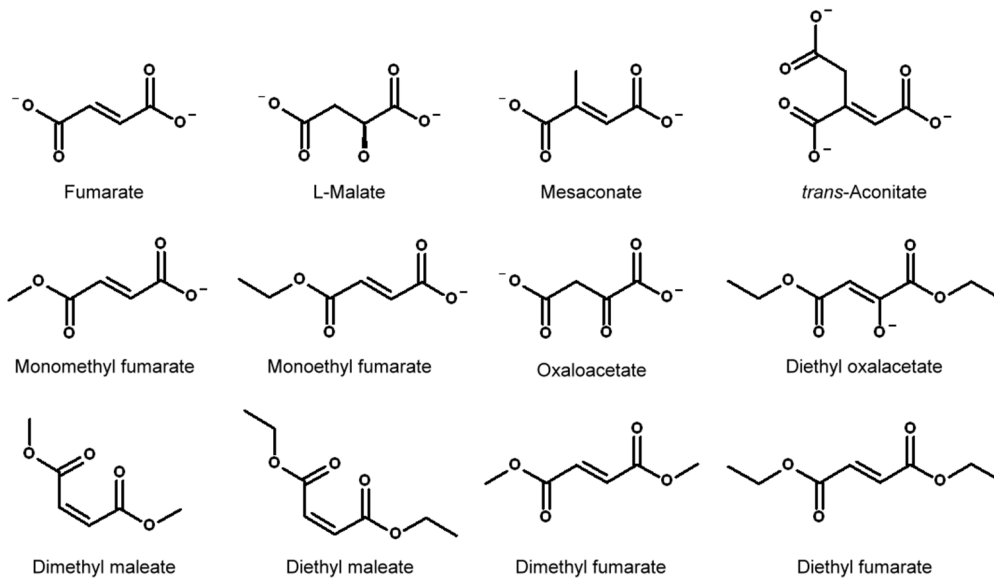

**Figure 1. Chemical structures of fumarate and its analogs.** These structures were generated using Accelrys Draw (Accelrys, USA). doi:10.1371/journal.pone.0098385.g001

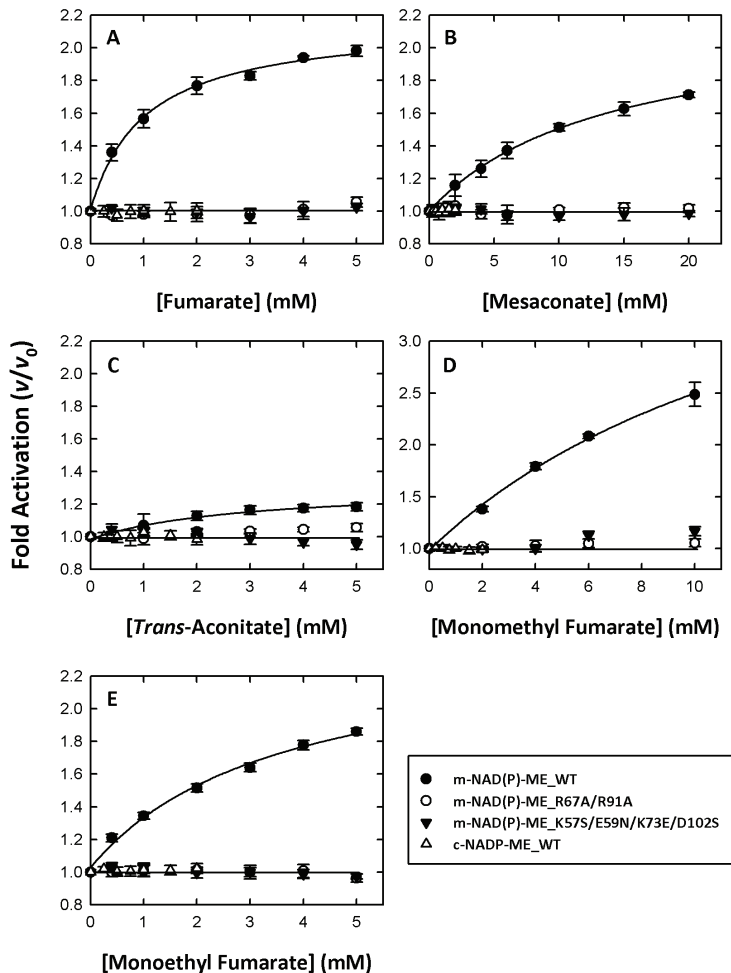

**Figure 2. Allosteric activation of human m-NAD(P)-ME by fumarate and its analogs.** (A) Fumarate; (B) Mesaconate; (C) *Trans*-aconitate; (D) Monomethyl fumarate; (E) Monoethyl fumarate. Closed circles, m-NAD(P)-ME; open circles, m-NAD(P)-ME\_R67A/R91A; closed triangles, m-NAD(P)-ME\_K57S/E59N/K73E/D102S; open triangles, c-NAD(P)-ME. The specific activities of the m-NAD(P)-ME WT, R67A/R91A, K57S/E59N/K73E/D102S and c-NAD(P)-ME WT were approximately 0.1, 0.005, 0.02 and 0.08  $\mu\text{mol}/\text{min}$ , respectively, and the final enzyme concentration in an individual assay was 20, 400, 100, and 25  $\text{ng}/\mu\text{l}$ , respectively. The  $v$  and  $v_0$  represented the enzyme activity in the presence and absence of fumarate analogs, respectively. doi:10.1371/journal.pone.0098385.g002

**Table 1.** Effect of fumarate analogs on human m-NAD(P)-ME and c-NADP-ME<sup>1,2</sup>.

|                         | <sup>3,4</sup> m-NAD(P)-ME WT | <sup>3,4</sup> m-NAD(P)-ME R67A/R91A | <sup>3,4</sup> m-NAD(P)-ME K57S/E59N/K73E/D102S | <sup>3,5</sup> c-NADP-ME WT |
|-------------------------|-------------------------------|--------------------------------------|-------------------------------------------------|-----------------------------|
| Fumarate                | 1.98±0.14                     | 0.98±0.06                            | 0.97±0.04                                       | 1.01±0.04                   |
| Mesaconate              | 1.75±0.16                     | 1.01±0.04                            | 0.99±0.05                                       | 1.02±0.03                   |
| <i>trans</i> -Aconitate | 1.15±0.03                     | 1.01±0.05                            | 0.98±0.03                                       | 0.99±0.04                   |
| Monomethyl fumarate     | 2.78±0.08                     | 1.07±0.03                            | 1.17±0.05                                       | 0.99±0.03                   |
| Monoethyl fumarate      | 1.83±0.04                     | 0.98±0.04                            | 1.01±0.05                                       | 1.01±0.03                   |
| Oxaloacetate            | 1.00±0.03                     | 0.94±0.02                            | 0.87±0.02                                       | 1.02±0.03                   |
| Diethyl oxalacetate     | 0.31±0.03                     | 0.85±0.02                            | 0.91±0.03                                       | 0.93±0.02                   |
| Dimethyl maleate        | 1.00±0.02                     | 0.97±0.02                            | 0.95±0.03                                       | 0.99±0.03                   |
| Diethyl maleate         | 0.88±0.03                     | 0.99±0.03                            | 0.95±0.03                                       | 1.01±0.02                   |
| Dimethyl fumarate       | 0.79±0.03                     | 0.99±0.02                            | 0.98±0.02                                       | 0.99±0.02                   |
| Diethyl fumarate        | 0.65±0.04                     | 0.92±0.01                            | 0.94±0.02                                       | 1.01±0.03                   |

<sup>1</sup>These values were the ratios of specific activities of the enzyme determined in the presence and absence of these chemical compounds.

<sup>2</sup>These values were the average with standard deviation of three-time repeats.

<sup>3</sup>The enzyme specific activities of the m-NAD(P)-ME WT, R67A/R91A, K57S/E59N/K73E/D102S and c-NADP-ME WT were approximately 0.1, 0.005, 0.02 and 0.08 μmol/min, respectively, and the final enzyme concentration in an individual assay was 20, 400, 100, and 25 ng/μl, respectively.

<sup>4</sup>For m-NAD(P)-ME, the final concentrations of these analogs were fixed at 5 mM, except for monoethyl fumarate and mesaconate, which were fixed at 10 mM and 20 mM, respectively.

<sup>5</sup>For c-NADP-ME, the final concentrations of these analogs were fixed at 2 mM.

doi:10.1371/journal.pone.0098385.t001

effect of structural analogs of the substrate malate and the allosteric activator fumarate on human m-NAD(P)-ME and, therefore, suggest that dicarboxylic acid in a *trans* conformation around the carbon-carbon double bond is required for the allosteric activation of the enzyme.

In this paper, the effects of fumarate analogs on m-NAD(P)-ME and c-NADP-ME were investigated. Among these analogs, diethyl oxaloacetate was found to be an allosteric inhibitor of human m-NAD(P)-ME.

## Results and Discussion

As previously mentioned, fumarate is the allosteric activator of human m-NAD(P)-ME [13]. Several residues have been shown to interact with fumarate directly or indirectly. The direct residues are Arg67 and Arg91, and the indirect residues are Lys57, Asp59, Lys73 and Asp102. Mutation of these residues causes the loss of the fumarate activating effect. Additionally, c-NADP-ME is unresponsive to fumarate activation. Here, the two fumarate-insensitive mutants, m-NAD(P)-ME\_R67A/R91A and m-NAD(P)-ME\_K57S/E59N/K73E/D102S, as well as c-NADP-ME, were used as the negative controls.

### Allosteric Activation of Human m-NAD(P)-ME by Fumarate and its Analogs

Figure 1 shows the chemical structures of fumarate and its analogs and Figure 2 shows the activating effects of fumarate and its analogs on m-NAD(P)-ME. Fumarate can activate the enzyme by approximately 2-fold (Figure 2A, close circles; Table 1), while the m-NAD(P)-ME\_R67A/R91A, m-NAD(P)-ME\_K57S/E59N/K73E/D102S and c-NADP-ME enzymes cannot be activated by fumarate (Figure 2, open circles, closed triangles and open triangles, respectively; Table 1). Mesaconate is a *trans* dicarboxylic acid with 2-methyl group substitution (Figure 1). Although it can activate the enzyme by approximately 1.7-fold (Table 1), the concentration needed for half-maximal activation is substantially higher than that of fumarate (Figure 2B, closed circles).

*Trans*-aconitate is also a *trans* dicarboxylic acid but with a 2-carboxylate group addition (Figure 1). This compound showed a slight activation of m-NAD(P)-ME (Figure 2C, closed circles; Table 1). Single methyl or ethyl group substitutions of the terminal carboxylate of fumarate (Figure 1) had no significant influence on the enzyme activation of these two fumarate analogs. Monomethyl and monoethyl fumarate displayed activating effects similar to fumarate (Figure 2, D and E, respectively, closed circles; Table 1), indicating that the binding modes of these two mono-substituted fumarates were not significantly changed.

### Allosteric Inhibition of Human m-NAD(P)-ME by Fumarate and its Analogs

Dimethyl or diethyl substitutions on both terminal carboxylates of fumarate (Figure 1) showed opposite effects on m-NAD(P)-ME. Dimethyl and diethyl fumarate inversely inhibited enzyme activity (Figure 3, A and B, respectively, closed circles; Table 1). Of the TCA cycle intermediates, fumarate and succinate are activators of the enzyme, but α-ketoglutarate (α-KG), the five-carbon α-ketodicarboxylic acid, is an inhibitor of ME.<sup>29</sup> Oxaloacetate (OAA), a four-carbon α-ketodicarboxylic acid, had little effect on m-NAD(P)-ME enzyme activity (Figure 3C, closed circles; Table 1). However, once the ethyl groups were substituted on both terminal carboxyl groups of OAA (Figure 1), the diethyl oxalacetate showed significant inhibition on m-NAD(P)-ME enzyme activity (Figure 3D, closed circles; Table 1). The IC<sub>50</sub> value of diethyl oxalacetate was approximately 2.5 mM.

Maleate, the *cis* isomer of fumarate, significantly inhibited ME activity [29]. However, dimethyl and diethyl maleate showed little inhibition of the enzyme activity (Figure 3, D and E, respectively, closed circles; Table 1). The fumarate analogs had activating or inhibiting effects on m-NAD(P)-ME (Figure 2 and 3, closed circles; Table 1) at different levels; however, they had no noticeable effects on c-NADP-ME (Figure 2 and 3, open triangles; Table 1). Furthermore, no further fumarate activation was displayed in the fumarate-binding abortive mutants, m-NAD(P)-ME\_R67A/R91A and m-NAD(P)-ME\_K57S/E59N/K73E/D102S (Figure 2 and 3,

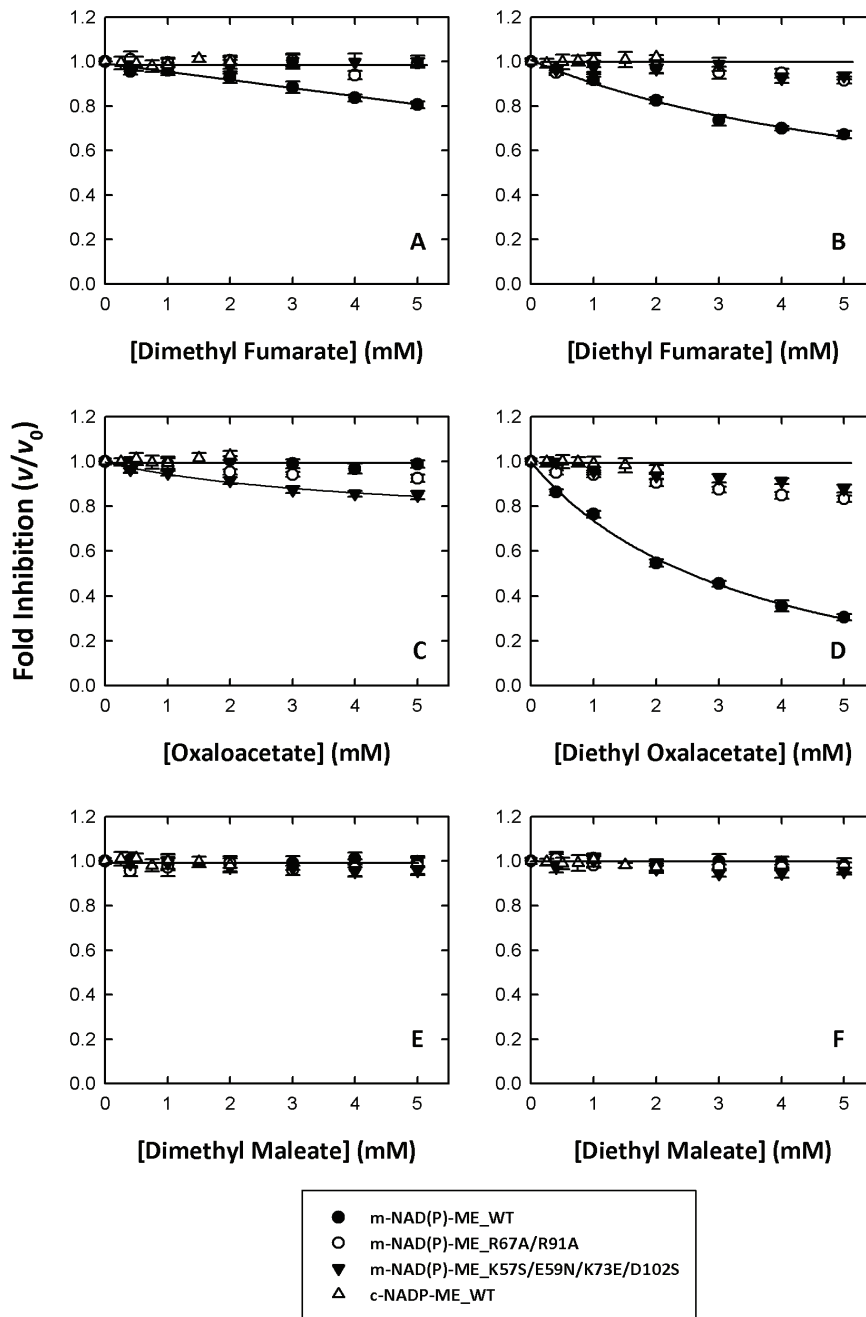

**Figure 3. Allosteric inhibition of human m-NAD(P)-ME by fumarate and its analogs.** (A) Dimethyl fumarate; (B) Diethyl fumarate; (C) Oxaloacetate; (D) Diethyl oxalacetate; (E) Dimethyl maleate; (F) Diethyl maleate. Closed circles, m-NAD(P)-ME; open circles, m-NAD(P)-ME\_R67A/R91A; closed triangles, m-NAD(P)-ME\_K57S/E59N/K73E/D102S; open triangles, c-NADP-ME. The specific activities of the m-NAD(P)-ME WT, R67A/R91A, K57S/E59N/K73E/D102S and c-NADP-ME WT were approximately 0.1, 0.005, 0.02 and 0.08  $\mu\text{mol}/\text{min}$ , respectively, and the final enzyme concentration in an individual assay was 20, 400, 100, and 25  $\text{ng}/\mu\text{l}$ , respectively. The  $v$  and  $v_0$  represented the enzyme activity in the presence and absence of fumarate analogs, respectively.  
doi:10.1371/journal.pone.0098385.g003

open circles and closed triangles, respectively; Table 1). Therefore, these fumarate analogs supposedly bind to the allosteric pocket of m-NAD(P)-ME at the dimer interface.

We found that diethyl oxalacetate may act as an allosteric inhibitor of the enzyme. To investigate this possibility, diethyl-oxalacetate inhibition experiments without or with fumarate were performed (Figure 4A, closed and open circles, respectively). It was clear that the inhibition of m-NAD(P)-ME by diethyl oxalacetate

was decreased if fumarate was present (Figure 4A). Moreover, we examined the effect of fumarate on the rescue of the diethyl oxalacetate-inhibited m-NAD(P)-ME enzyme activity (Figure 4B). The m-NAD(P)-ME enzyme was first preincubated with 3 mM diethyl oxalacetate. The residual enzyme activity increased from 50% to over 100% with increasing fumarate concentrations, indicating that fumarate not only restores the enzyme activity but also activates the enzyme further. The above results also implied

that diethyl-oxalacetate competes with fumarate in the allosteric pocket at the dimer interface.

## Conclusion

This paper reported an allosteric inhibitor of human m-NAD(P)-ME, diethyl oxalacetate. Because the binding of the allosteric inhibitors may impede the conformational change from open form to closed form, this paper may provide another rationale in designing allosteric inhibitors of the human m-NAD(P)-ME, a molecular target for cancer biology [11,20].

## Materials and Methods

### Chemicals

L(-)-malate, fumarate, mesaconate, *trans*-aconitate, monomethyl fumarate, monoethyl fumarate, oxaloacetate, diethyl oxalacetate, dimethyl maleate, diethyl maleate, dimethyl fumarate and diethyl fumarate were purchased from Fluka (Buchs, Switzerland).

### Expression and Purification of the Recombinant m-NAD(P)-ME and c-NADP-ME

The protocols for the preparation of human m-NAD(P)-ME and c-NADP-ME have been previously described [30–32]. For m-NAD(P)-ME, the pRH281 expression plasmid was used to carry the gene, and expression was controlled by a *tp* promoter, which was modulated by the addition of  $\beta$ -indol-3-acetic acid (IAA). The expression vector was transformed into *Escherichia coli* BL21 cells to overexpress human m-NAD(P)-ME. The overexpressed enzyme was then purified by ATP affinity chromatography (Sigma). For c-NADP-ME, the pET21b expression plasmid was used to carry the gene, and expression was controlled by an inducible T7 promoter system, which was modulated by the addition of isopropyl  $\beta$ -D-1-thiogalactopyranoside (IPTG). The expression vector was transformed into *E. coli* BL21(DE3) cells to overexpress human c-NADP-ME. The overexpressed enzyme was then purified using a HIS-Select Nickel Affinity Gel column (Sigma). The lysate-Ni-NTA mixture was washed with buffer (10 mM imidazole, 500 mM sodium chloride, 2 mM  $\beta$ -mercaptoethanol, and 30 mM Tris-HCl, pH 7.4) to remove the discarded proteins, and c-NADP-ME was subsequently eluted with elution buffer (250 mM imidazole, 500 mM sodium chloride, 2 mM  $\beta$ -mercaptoethanol, and 30 mM Tris-HCl, pH 7.4). The purified enzymes were buffer-exchanged and concentrated in a 30 mM Tris buffer (pH 7.4) using an Amicon Ultra-15 centrifugal filter device (Millipore) with a molecular weight cut-off of 30 kDa. Enzyme purity was examined by SDS-PAGE, and protein concentration was determined using the Bradford method [33].

### Site-directed Mutagenesis

Single and double mutants were constructed using the QuikChange kit (Stratagene); the human m-NAD(P)-ME expression vector (pRH281) was used as a template for mutagenesis. The following PCR primers were used: 5'-CTTCAAGGACTTC-TACCTCCCTCTATAGAGACACAAGATATTC-3' for K57S; 5'-CGATTTCATAGAACTTGGAATAAATGACTAGCCCT-TTGG-3' for K73E; 5'-GTTTTATAGAATACTGCAATCC-GACATTGAGAGTTTAATGCC-3' for D102S; 5'-CTACCT-CCCTCTATAAACACACAAGATATTCAAGCC-3' for K57S/E59N; 5'-CACAAAGATATTCAAGCCTTAGCGTTTCATA-GAACTTGAAG-3' for R67A, and 5'-CTACATAATGGGAA-TACAAGAAGCGAATGAGAAATTGTTTTATAG-3' for R91A. The PCR reaction was performed with the *Pfu* DNA polymerase and was incubated at 95°C for 30 sec, 55°C for 1 min

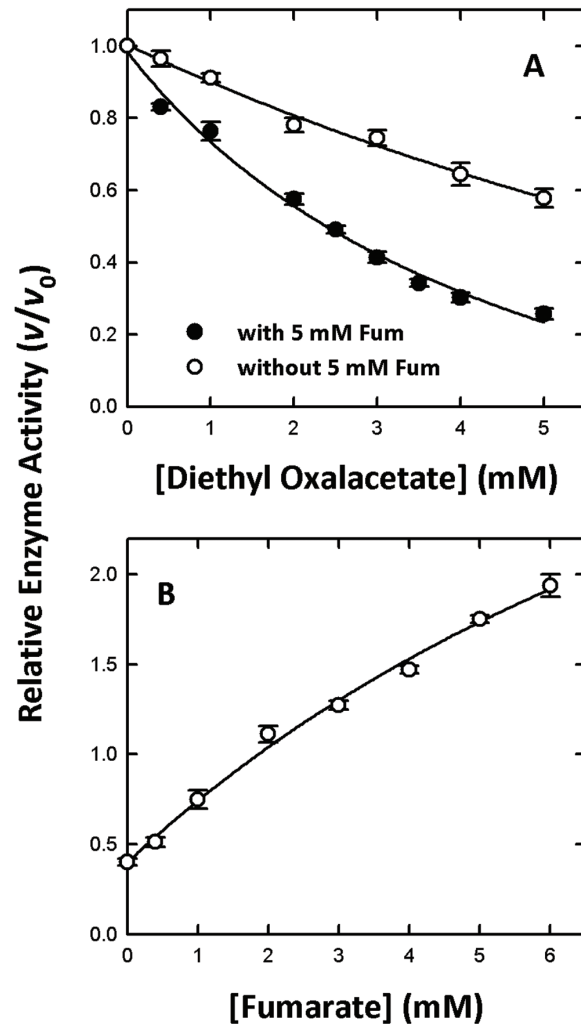

**Figure 4. Effect of fumarate on diethyl oxalacetate-inhibited m-NAD(P)-ME activity.** (A) The diethyl oxalacetate inhibition experiment of WT m-NAD(P)-ME without (closed circles) or with (open circles) 5 mM fumarate. (B) The fumarate rescue experiment of WT m-NAD(P)-ME. The enzyme was preincubated with 3 mM diethyl oxalacetate, and then the activity was restored with increasing concentrations of fumarate. The specific activities of the m-NAD(P)-ME WT was approximately 0.1  $\mu\text{mol}/\text{min}$  and the final enzyme concentration in an individual assay was 20 ng/ $\mu\text{l}$ . The  $v$  and  $v_0$  represented the enzyme activity in the presence and absence of fumarate analogs, respectively. doi:10.1371/journal.pone.0098385.g004

and 68°C for 2 min per kb of plasmid length for 16–20 cycles. The templates were digested with the *DpnI* restriction enzyme, and the resulting plasmid containing the desired mutation was transformed into *E. coli* XL-1 cells (Stratagene). All mutation sites were checked by sequencing.

### Enzyme Activity Assay

Human m-NAD(P)-ME and c-NADP-ME were assayed in reaction buffer containing 50 mM Tris-HCl (pH 7.4), 15 mM L-malate, 1 mM  $\text{NAD}^+/\text{NADP}^+$  and 10 mM  $\text{MgCl}_2$  with various concentrations of fumarate or its analogs in a total volume of 1 ml. The absorbance at 340 nm was continuously monitored in a UV/VIS spectrophotometer Lambda 25 (Perkin Elmer, USA). An absorption coefficient of  $6.22 \text{ cm}^{-1} \text{ mM}^{-1}$  at 340 nm for NAD(P)H was used in the calculations. The diethyl oxalacetate

inhibition experiment was assayed with 50 mM Tris-HCl (pH 7.4), 10 mM malate (pH 7.4), 10 mM  $\text{MgCl}_2$  and 1.0 mM  $\text{NAD}^+$  without or with 5 mM fumarate and a series of diethyl oxalacetate concentrations, ranging from 0 to 5 mM. The fumarate rescue experiment was assayed with 50 mM Tris-HCl (pH 7.4), 10 mM malate (pH 7.4), 10 mM  $\text{MgCl}_2$  and 1.0 mM  $\text{NAD}^+$  with 3 mM diethyl oxalacetate and a series of fumarate concentrations, ranging from 0 to 6 mM. All of the calculations

were performed using the Sigma Plot 10.0 software program (Jandel, San Rafael, CA).

## Author Contributions

Performed the experiments: JYH PCY. Analyzed the data: JHL HCH. Contributed reagents/materials/analysis tools: CLL GYL HCH. Wrote the paper: HCH.

## References

- Frenkel R (1975) Regulation and physiological function of malic enzyme. *Curr Top Cellu Regul* 9: 157–181.
- Loeber G, Infante AA, Maurer-Fogy I, Krystek E, Dworkin MB (1991) Human  $\text{NAD}^+$ -dependent mitochondrial malic enzyme. *J Biol Chem* 266: 3016–3021.
- Rao GS, Coleman DE, Kulkarni G, Goldmith EJ, Cook PF, et al. (2000)  $\text{NAD}^+$ -malic enzyme from *Ascaris suum*: sequence and structural studies. *Protein Pept Lett* 7: 297–304.
- Chang GG, Tong L (2003) Structure and function of malic enzymes, a new class of oxidative decarboxylases. *Biochemistry* 42: 12721–12733.
- Hsu RY (1982) Pigeon liver malic enzyme. *Mol Cell Biochem* 43: 3–26.
- Chang GG, Huang TM, Wang JK, Lee HJ, Chou WY, et al. (1992) Meng, C. L. Kinetic mechanism of the cytosolic malic enzyme from human breast cancer cell line. *Arch Biochem Biophys* 296: 468–473.
- Mandella RD, Sauer LA (1975) The mitochondrial malic enzymes I. Submitochondrial localization and purification and properties of the  $\text{NAD(P)}^+$ -dependent enzyme from adrenal cortex. *J Biol Chem* 250: 5877–5884.
- Moreadith RW, Lehninger AL (1984) Purification, kinetic behavior, and regulation of  $\text{NAD(P)}^+$  malic enzyme of tumour mitochondria. *J Biol Chem* 259: 6222–6227.
- Loeber G, Maurer-Fogy I, Schwendenwein R (1994) Purification, cDNA cloning, and heterologous expression of the human mitochondrial  $\text{NAD(P)}^+$ -dependent malic enzyme. *Biochem J* 304: 687–692.
- Hsieh JY, Liu GY, Chang GG, Hung HC (2006) Determinants of the dual cofactor specificity and substrate cooperativity of the human mitochondrial  $\text{NAD(P)}^+$ -dependent malic enzyme: functional roles of glutamine 362. *J Biol Chem* 281: 23237–23245.
- Vander Heiden MG, Cantley LC, Thompson CB (2009) Understanding the Warburg effect: the metabolic requirements of cell proliferation. *Science* 324: 1029–33.
- Yang Z, Lanks CW, Tong L (2002) Molecular mechanism for the regulation of human mitochondrial  $\text{NAD(P)}^+$ -dependent malic enzyme by ATP and fumarate. *Structure* 10: 951–960.
- Hsu WC, Hung HC, Tong L, Chang GG (2004) Dual functional roles of ATP in the human mitochondrial malic enzyme. *Biochemistry* 43: 7382–7390.
- Hung HC, Chien YC, Hsieh JY, Chang GG, Liu GY (2005) Functional roles of ATP-binding residues in the catalytic site of human mitochondrial  $\text{NAD(P)}^+$ -dependent malic enzyme. *Biochemistry* 44: 12737–12745.
- Sauer LA, Dauchy RT, Nagel WO, Morris HP (1980) Mitochondrial malic enzymes. Mitochondrial  $\text{NAD(P)}^+$ -dependent malic enzyme activity and malate-dependent pyruvate formation are progression-linked in Morris hepatomas. *J Biol Chem* 255: 3844–3848.
- Baggetto LG (1992) Deviant energetic metabolism of glycolytic cancer cells. *Biochimie* 74: 959–974.
- Sanz N, Diez-Fernandez D, Valverde AM, Lorenzo M, Benito M, et al. (1997) Malic enzyme and glucose 6-phosphate dehydrogenase gene expression increases in rat liver cirrhogenesis. *Br J Cancer* 75: 487–492.
- Moreadith RW, Lehninger AL (1984) The pathways of glutamate and glutamine oxidation by tumour cell mitochondria. Role of mitochondrial  $\text{NAD(P)}^+$ -dependent malic enzyme. *J Biol Chem* 259: 6215–6221.
- Fahien LA, Teller JK (1992) Glutamate-malate metabolism in liver mitochondria. *J Biol Chem* 267: 10411–10422.
- Jiang P, Du W, Mancuso A, Wellen KE, Yang X (2013) Reciprocal regulation of p53 and malic enzymes modulates metabolism and senescence. *Nature* 493: 689–93.
- Jiang D, Attardi LD (2013) Engaging the p53 metabolic brake drives senescence. *Cell Res* 23: 739–740.
- Xu Y, Bhargava G, Wu H, Loeber G, Tong L (1999) Crystal structure of human mitochondrial  $\text{NAD(P)}^+$ -dependent malic enzyme: a new class of oxidative decarboxylases. *Structure* 7: 877–889.
- Yang Z, Floyd DL, Loeber G, Tong L (2000) Structure of a closed form of human malic enzyme and implications for catalytic mechanism. *Nat Struct Biol* 7: 251–257.
- Tao X, Yang Z, Tong L (2003) Crystal structures of substrate complexes of malic enzyme and insights into the catalytic mechanism. *Structure* 11: 1141–1150.
- Hsieh JY, Chen SH, Hung HC (2009) Functional roles of the tetramer organization of malic enzyme. *J Biol Chem* 284: 18096–18105.
- Hsieh JY, Chiang YH, Chang KY, Hung HC (2009) Functional role of fumarate site Glu59 involved in allosteric regulation and subunit-subunit interaction of human mitochondrial  $\text{NAD(P)}^+$ -dependent malic enzyme. *FEBS J* 276: 983–994.
- Hung HC, Kuo MW, Chang GG, Liu GY (2005) Characterization of the functional role of allosteric site Asp102 in the regulatory mechanism of human mitochondrial  $\text{NAD(P)}^+$ -dependent malic enzyme. *Biochem J* 392: 39–45.
- Hsieh JY, Liu JH, Fang YW, Hung HC (2009) Dual roles of Lys57 at the dimer interface of human mitochondrial  $\text{NAD(P)}^+$ -dependent malic enzyme. *Biochem J* 420: 201–209.
- Su KL, Chang KY, Hung HC (2009) Effects of structural analogues of the substrate and allosteric regulator of the human mitochondrial  $\text{NAD(P)}^+$ -dependent malic enzyme. *Bioorg Med Chem* 17: 5414–5419.
- Bhargava G, Mui S, Pav S, Wu H, Loeber G, et al. (1999) Preliminary crystallographic studies of human mitochondrial  $\text{NAD(P)}^+$ -dependent malic enzyme. *J Struct Biol* 127: 72–75.
- Hsieh JY, Hung HC (2009) Engineering of the cofactor specificities and isoform-specific inhibition of malic enzyme. *J Biol Chem* 284: 4536–4544.
- Murugan S, Hung HC (2012) Biophysical Characterization of the Dimer and Tetramer Interface Interactions of the Human Cytosolic Malic Enzyme. *PLoS ONE* 7(12): e50143. doi:10.1371/journal.pone.0050143.
- Bradford MM (1976) A rapid and sensitive method for the quantitation of microgram quantities of protein, utilizing the principle of protein-dye binding. *Anal Biochem* 72: 248–254.
